# Supplementary material for: The Effect of Elasticity of Gelatin Nanoparticles on the Interaction with Macrophages
Source: MDPI journal article supplement (doi:10.3390/pharmaceutics15010199), 2023-01-06
Supplement: s1 [file s1]

## Supplementary Material

### The Effect of Elasticity of Gelatin Nanoparticles on the Interaction with Macrophages

Metin Yildirim <sup>1,2</sup>, Agnes-Valencia Weiss <sup>1</sup> and Marc Schneider <sup>1,\*</sup>

<sup>1</sup> Department of Pharmacy, Biopharmaceutics and Pharmaceutical Technology, Saarland University, 66123 Saarbrücken, Germany

<sup>2</sup> Department of Pharmacy Services, Vocational School of Health Services, Tarsus University, 33400 Mersin, Turkey

\* Correspondence: marc.schneider@uni-saarland.de

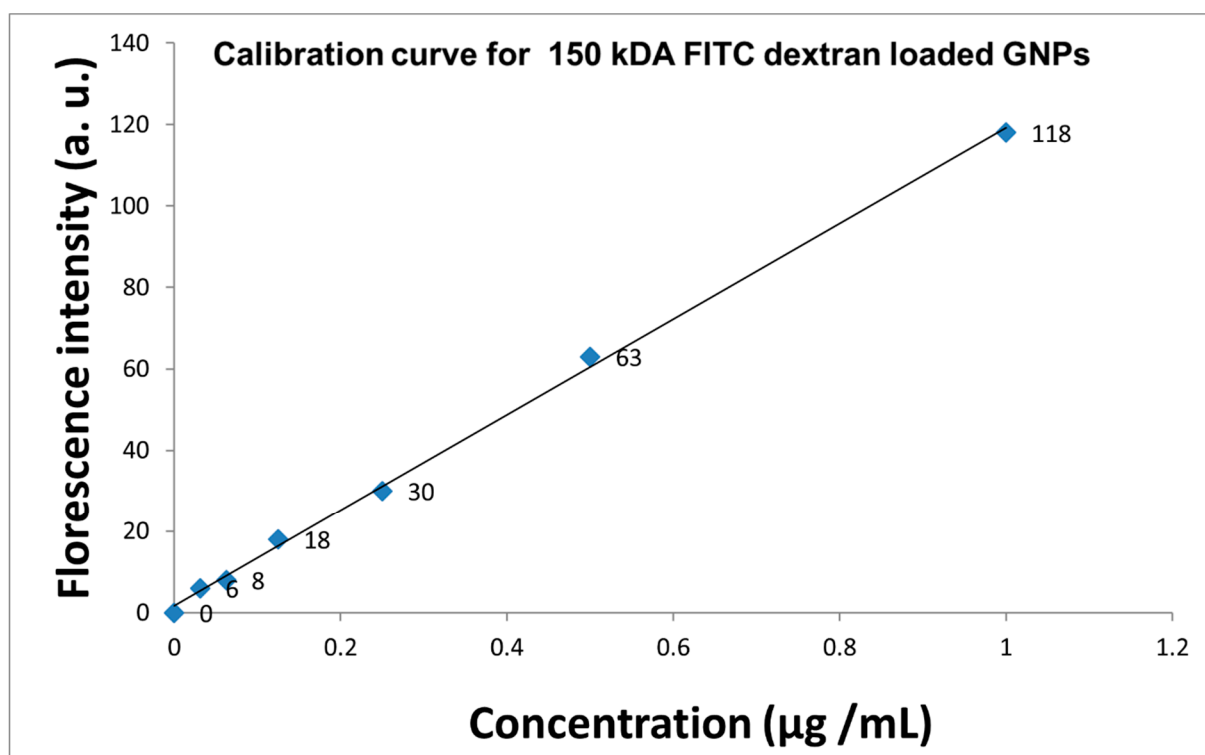

Figure S1: Calibration curve of 150 kDA FITC-dextran-loaded GNPs

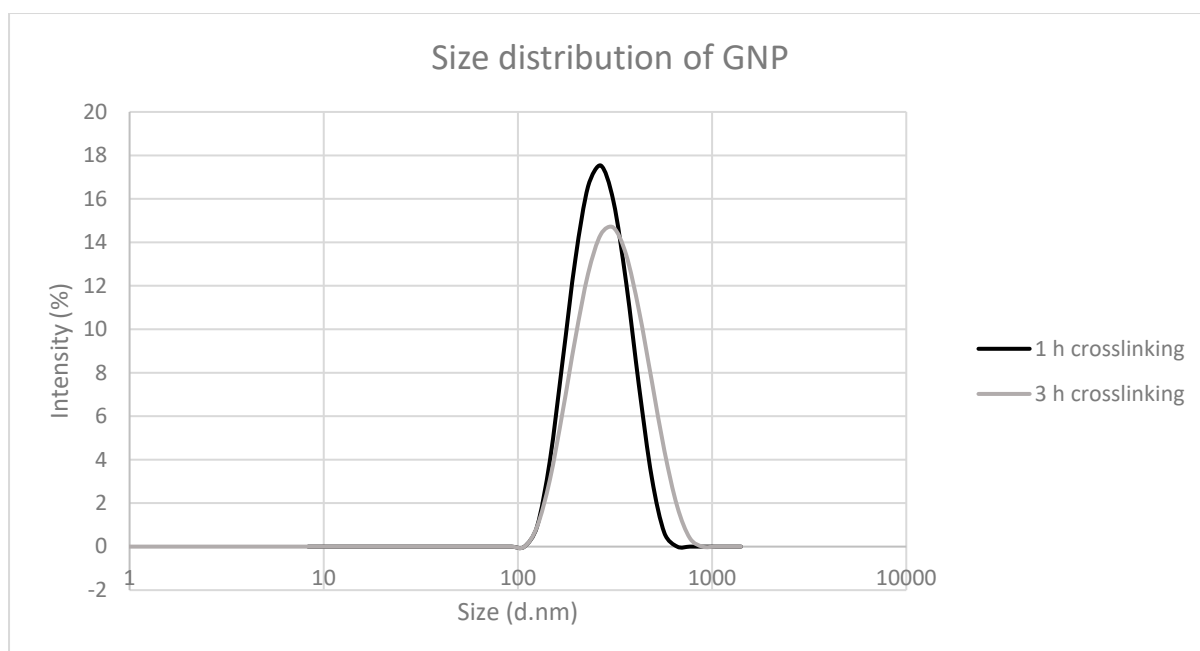

**Figure S2:** Size distribution of GNPs crosslinked for 1 and 3 h. Data represents a representative measurement for each formulation
